# Supplementary material for: Extending the Metabolite Diversity of the Endophyte Dimorphosporicola tragani
Source: PubMed Central journal article supplement (PMC6835440; doi:10.3390/metabo9100197), 2019-09-21
Supplement: metabolites-09-00197-s001.pdf [file metabolites-09-00197-s001.pdf]

*Supplementary Information*

**Extending the metabolite diversity of the endophyte  
*Dimorphosporicola tragani***

**Victor González-Menéndez\*, Gloria Crespo, Clara Toro, Jesus Martín, Nuria de Pedro, Jose R Tormo and Olga Genilloud\***

<sup>1</sup> Fundación MEDINA, Parque Tecnológico Ciencias de la Salud. Avda. del Conocimiento 34, 18016 Granada, Spain;

\* Correspondence: victor.gonzalez@medinaandalucia.es; (V.G-M.); olga.genilloud@medinaandalucia.es; (O.G.)  
Tel.: +34-958-993-965 (V.G-M. & O.G.)

Received: date; Accepted: date; Published: date

## Table of Contents

|                                                                        |            |
|------------------------------------------------------------------------|------------|
| <b>Figure S1.</b> Chromatogram and Spectrum of Cerulenin by HRMS       | <b>S3</b>  |
| <b>Figure S2.</b> <sup>1</sup> H-NMR of Cerulenin                      | <b>S4</b>  |
| <b>Figure S3.</b> Chromatogram and Spectrum of Dendrodolide E by HRMS  | <b>S5</b>  |
| <b>Figure S4.</b> <sup>1</sup> H-NMR of Dendrodolide E                 | <b>S6</b>  |
| <b>Figure S5.</b> HSQC of Dendrodolide E                               | <b>S6</b>  |
| <b>Figure S6.</b> Chromatogram and Spectrum of Dendrodolide G by HRMS  | <b>S7</b>  |
| <b>Figure S7.</b> <sup>1</sup> H-NMR of Dendrodolide G                 | <b>S8</b>  |
| <b>Figure S8.</b> HSQC of Dendrodolide G                               | <b>S8</b>  |
| <b>Figure S9.</b> <sup>13</sup> C -NMR of Dendrodolide G               | <b>S9</b>  |
| <b>Figure S10.</b> Chromatogram and Spectrum of Dendrodolide I by HRMS | <b>S10</b> |
| <b>Figure S11.</b> <sup>1</sup> H-NMR of Dendrodolide I                | <b>S11</b> |
| <b>Figure S12.</b> HSQC of Dendrodolide I                              | <b>S11</b> |

## Cerulenin identification

Cerulenin molecular formula  $C_{12}H_{17}NO_3$  was established by HRMS:  $[M+H]^+$   $m/z$  224.128 (calcd for  $C_{12}H_{18}NO_3$ , 224.130)

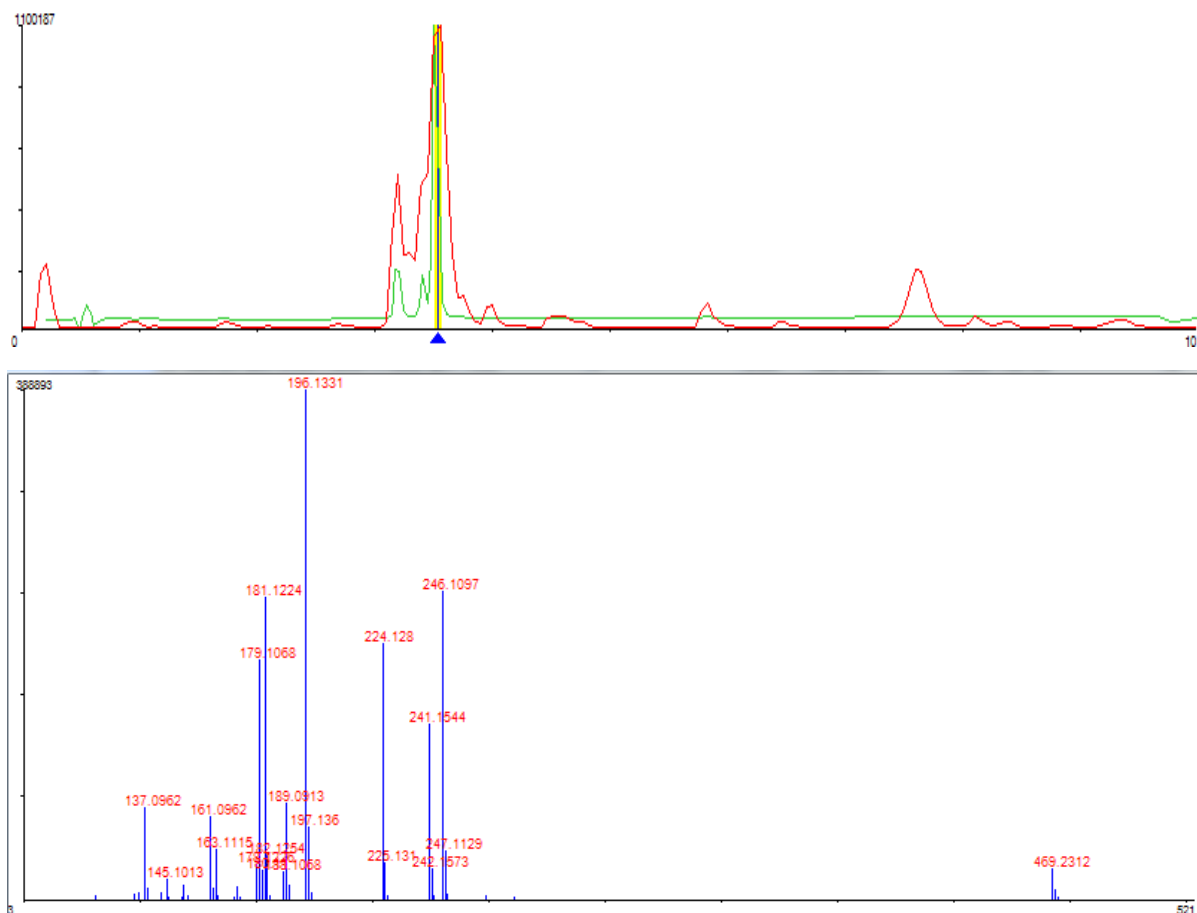

**Figure S1.** Chromatogram and Spectrum of Cerulenin by HRMS

NMR spectrum of Cerulenin in CDCl<sub>3</sub>

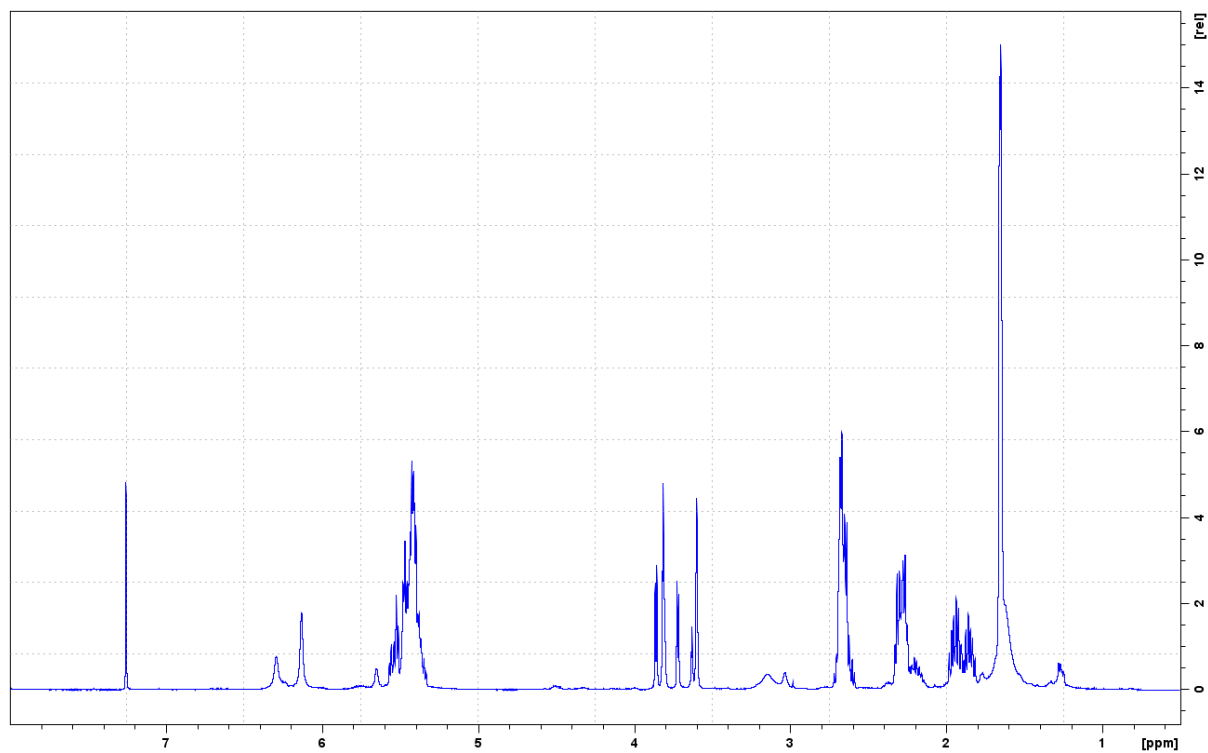

Figure S2. <sup>1</sup>H-NMR of Cerulenin

## Dendrolide E identification

Dendrolide E molecular formula  $C_{12}H_{16}O_4$  was established by HRMS:  $[M+H]^+$   $m/z$  225.112 (calcd for  $C_{12}H_{17}O_4$ , 225.1127)

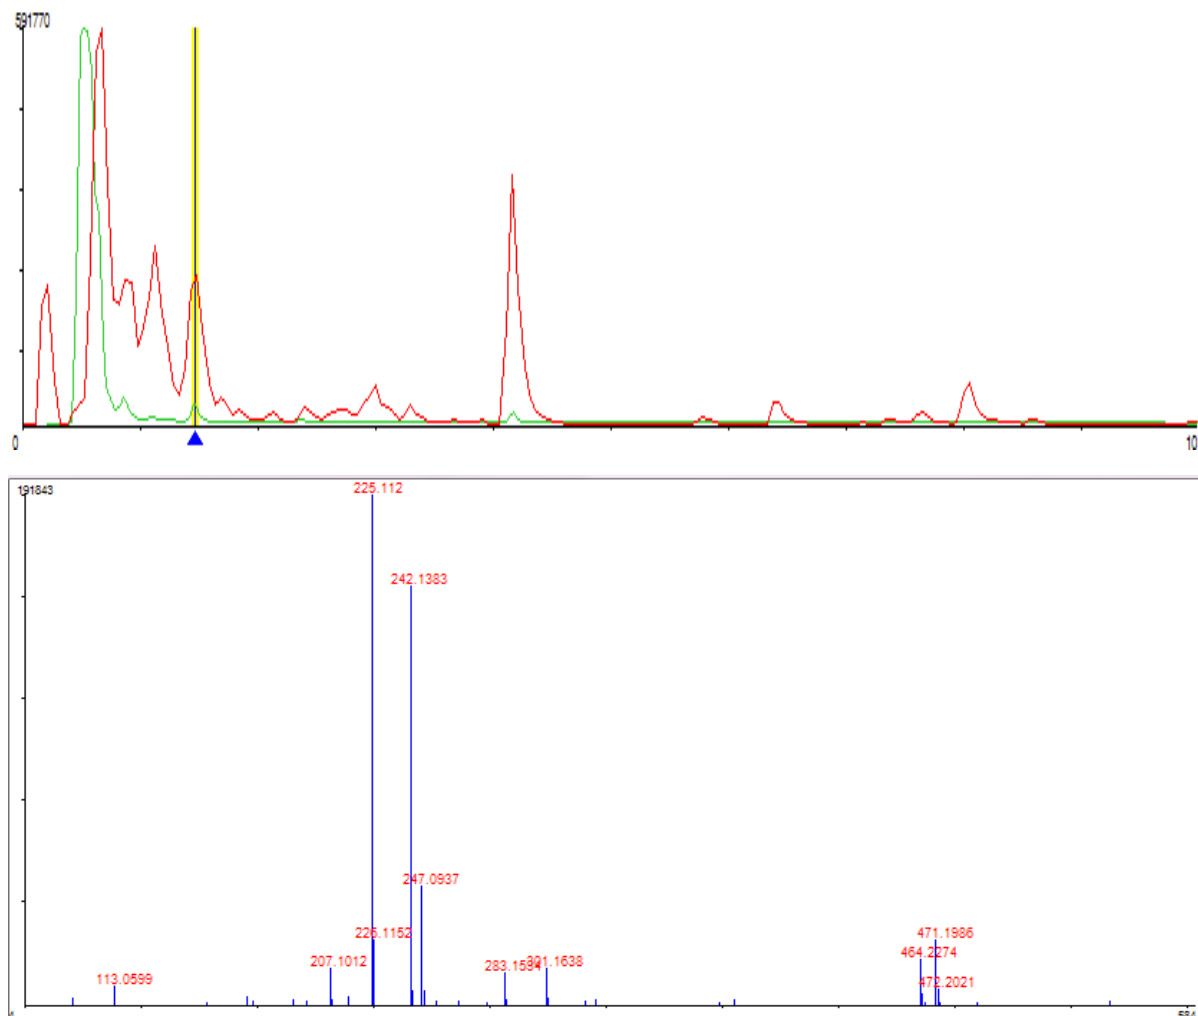

**Figure S3.** Chromatogram and Spectrum of Dendrolide E by HRMS

NMR spectra in MeOD

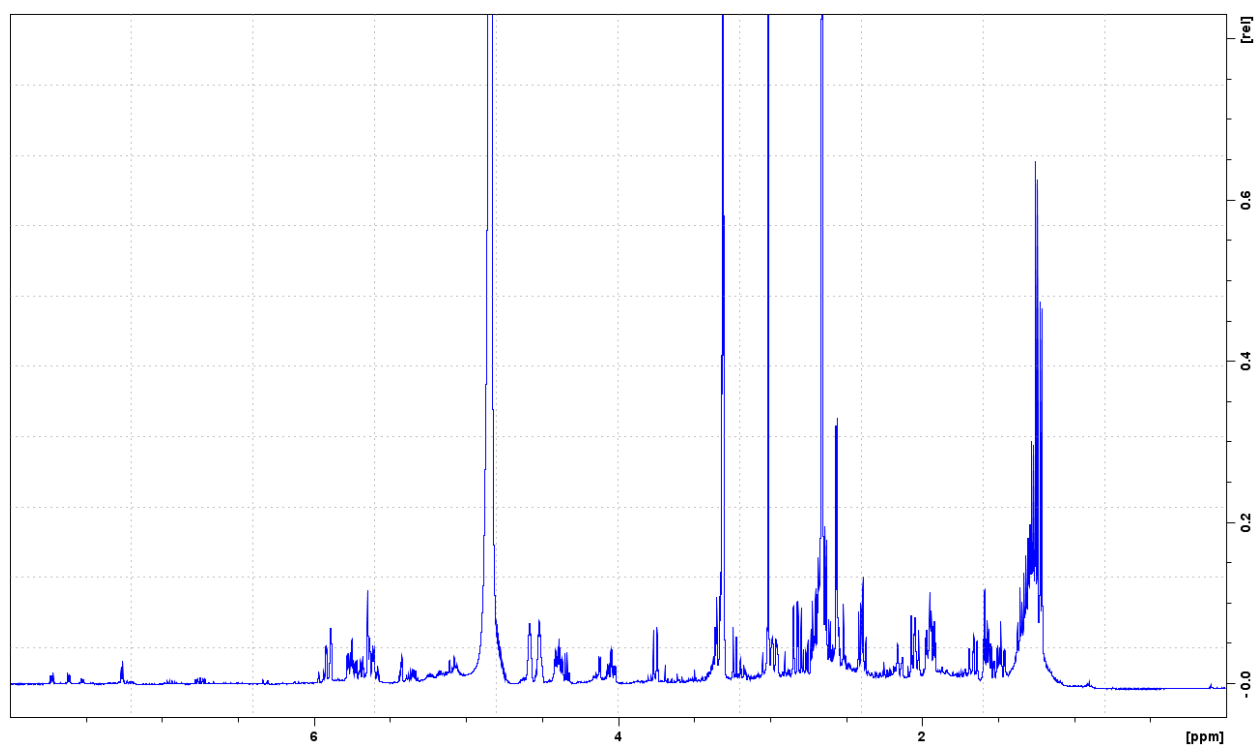

Figure S4.  $^1\text{H}$ -NMR of Dendrodolide E

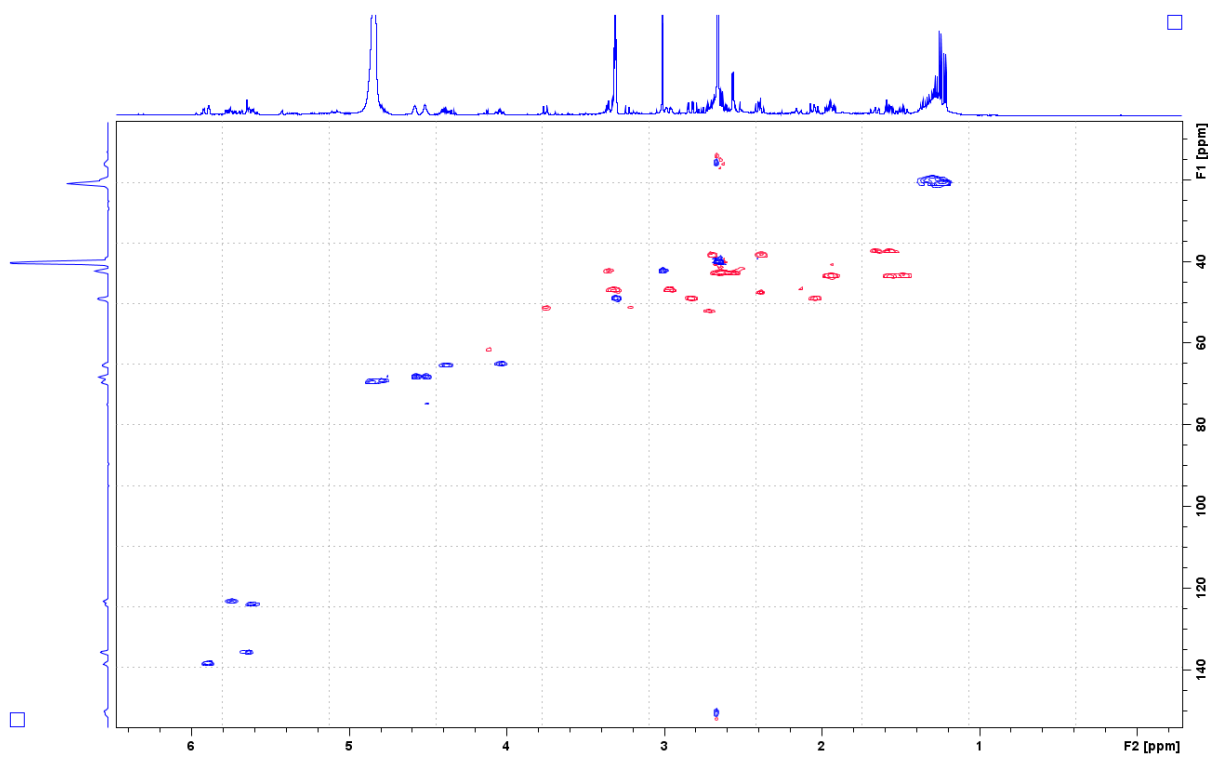

Figure S5. HSQC of Dendrodolide E

## Dendrodolide G identification

Dendrodolide G molecular formula  $C_{12}H_{18}O_4$  was established by HRMS:  $[M+H]^+$   $m/z$  227.1282 (calcd for  $C_{12}H_{19}O_4$ , 227.1283)

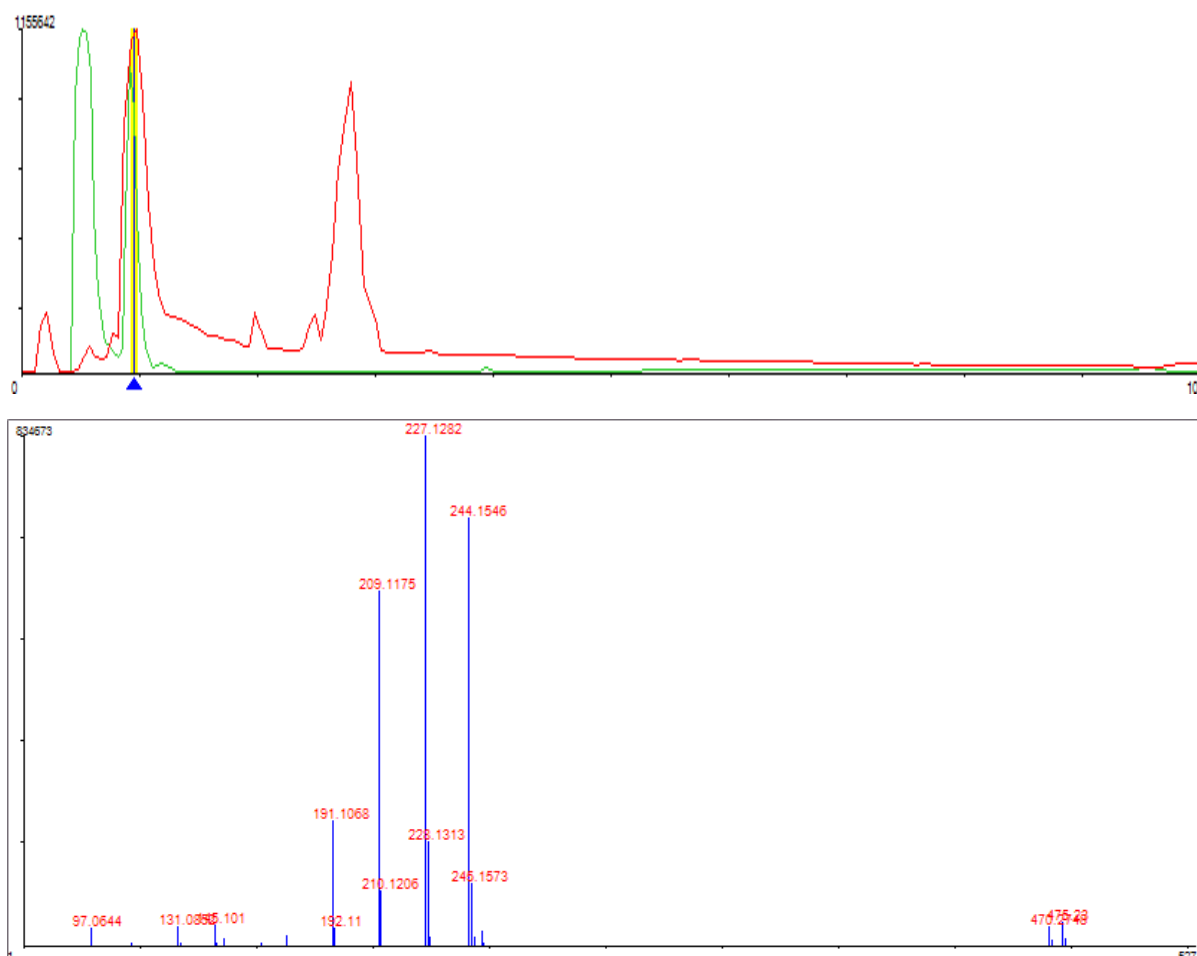

**Figure S6.** Chromatogram and Spectrum of Dendrodolide G by HRMS

NMR spectra in MeOD

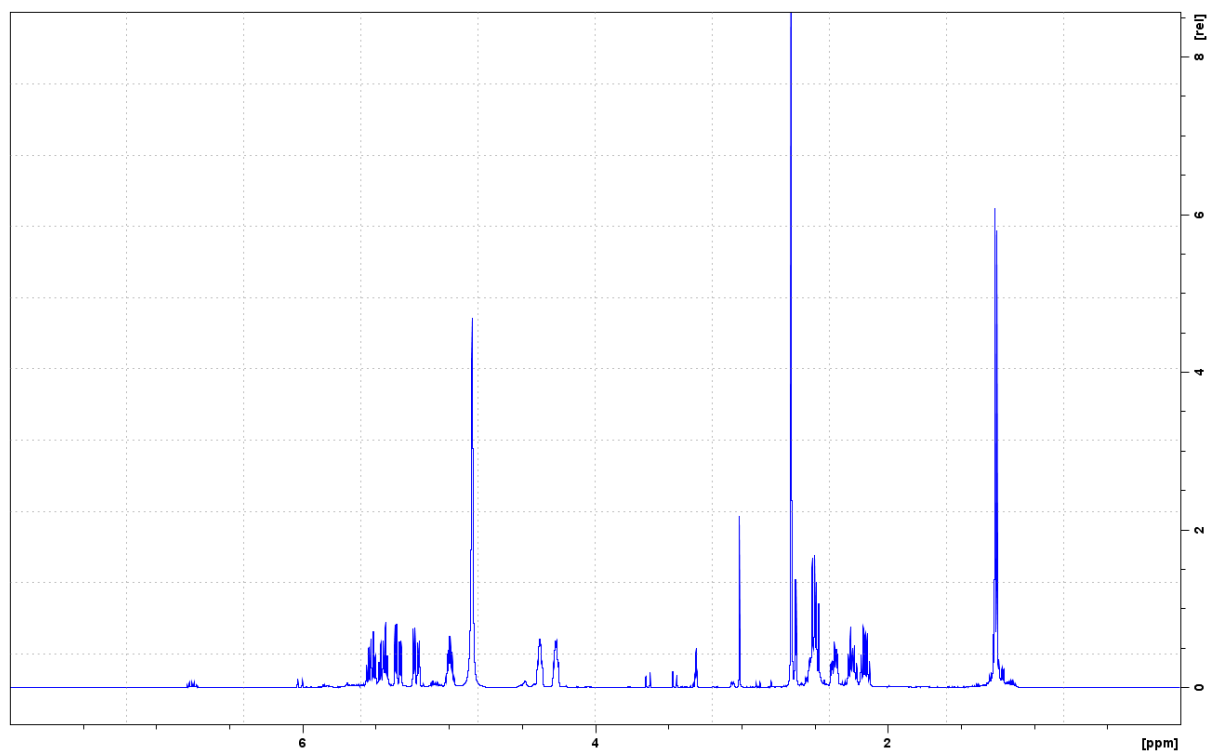

Figure S7.  $^1\text{H}$ -NMR of Dendrodolide G

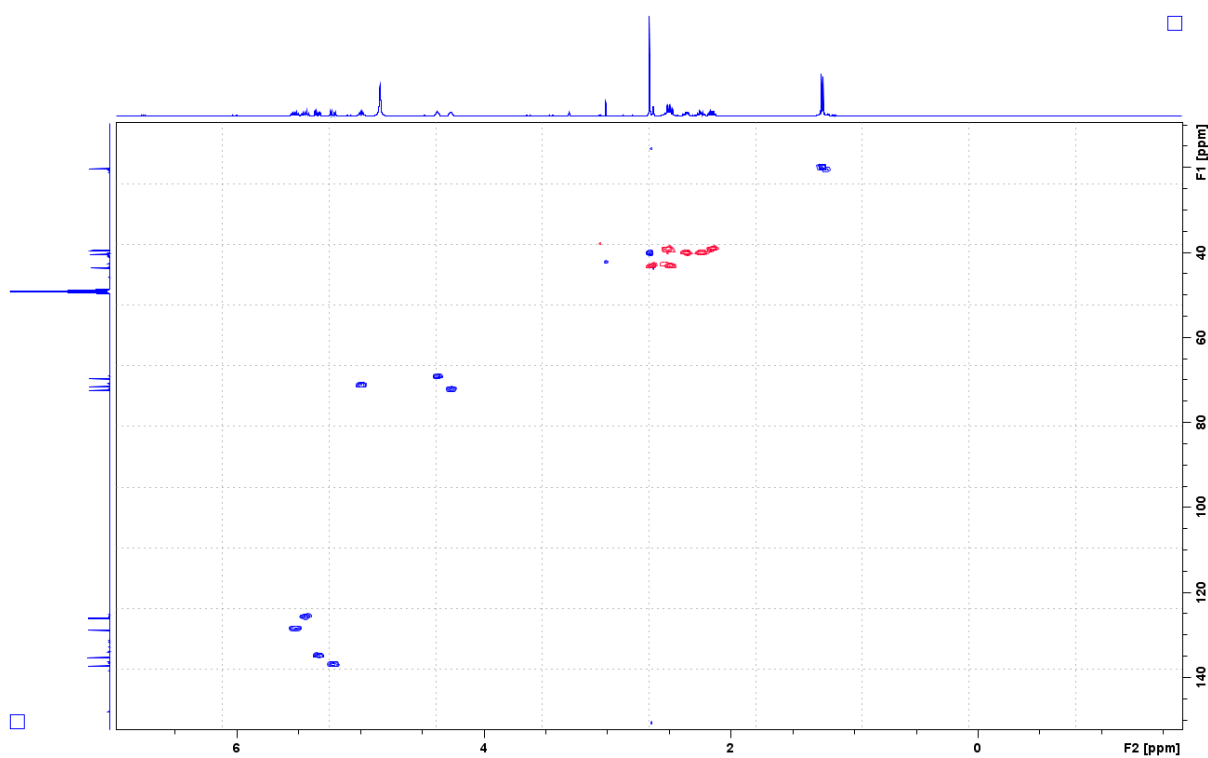

Figure S8. HSQC of Dendrodolide G



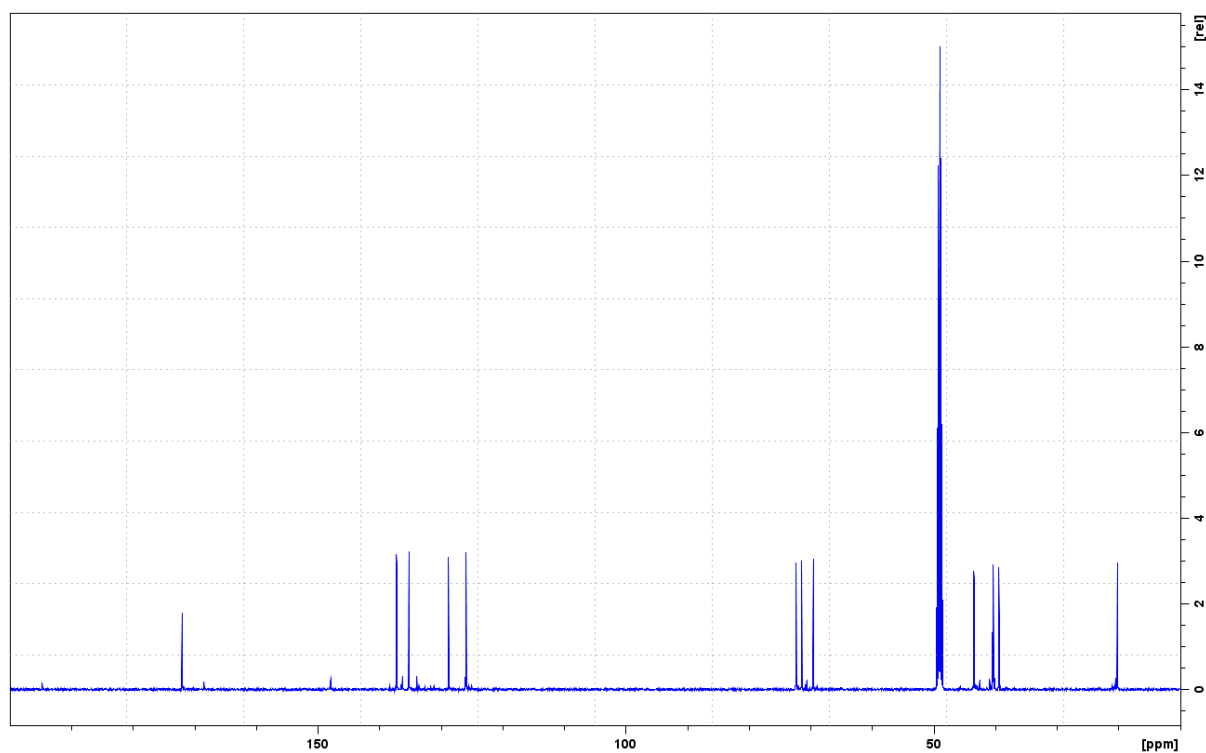

**Figure S9.**  $^{13}\text{C}$ -NMR of Dendrodolide G

## Dendrodolide I identification

Dendrodolide I molecular formula  $C_{12}H_{20}O_4$  was established by HRMS:  $[M+Na]^+$   $m/z$  251.1247 (calcd for  $C_{12}H_{20}O_4Na$ , 251.1259)

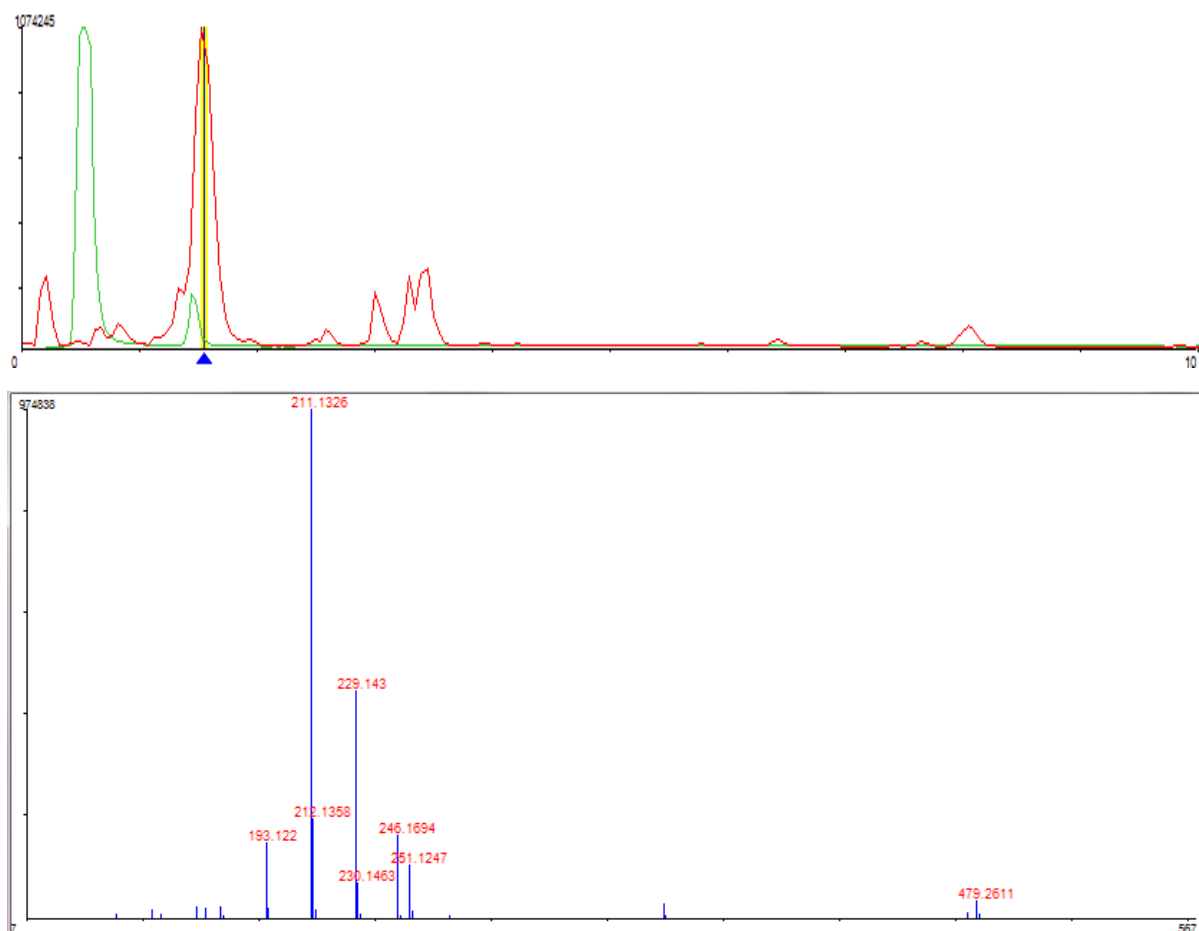

**Figure S10.** Chromatogram and Spectrum of Dendrodolide I by HRMS

NMR spectra in MeOD

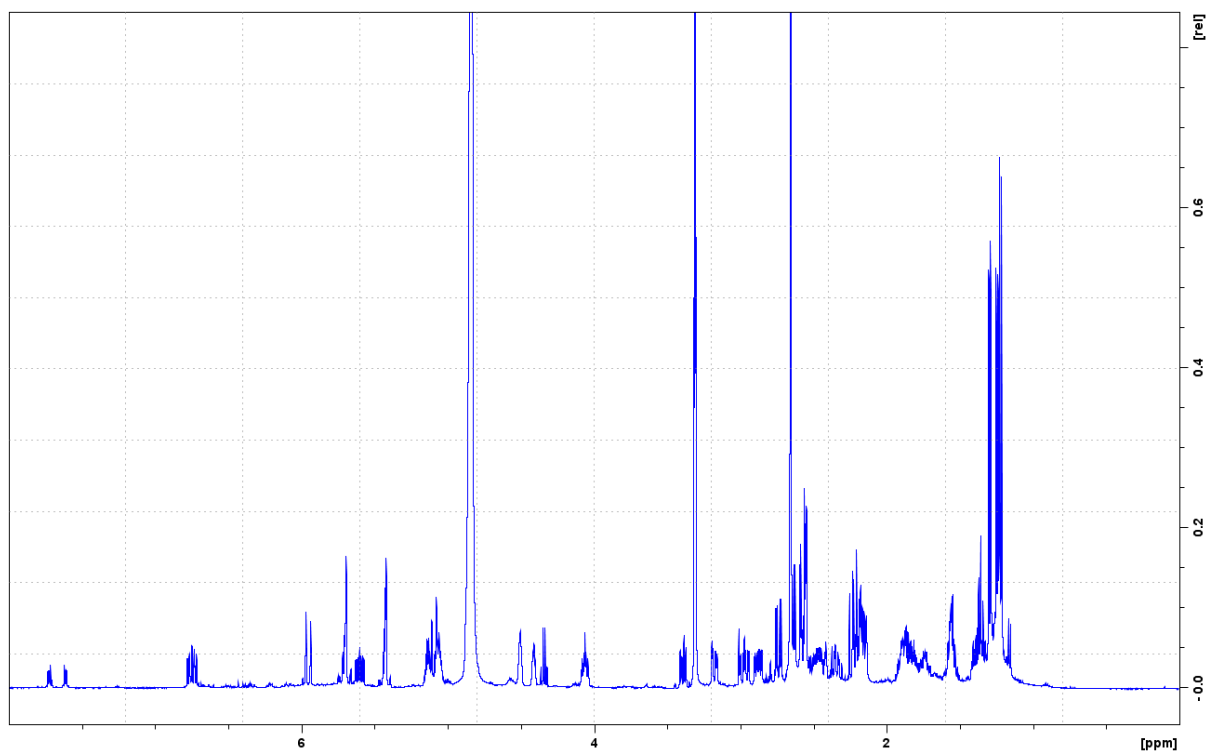

Figure S11.  $^1\text{H-NMR}$  of Dendrodolide I

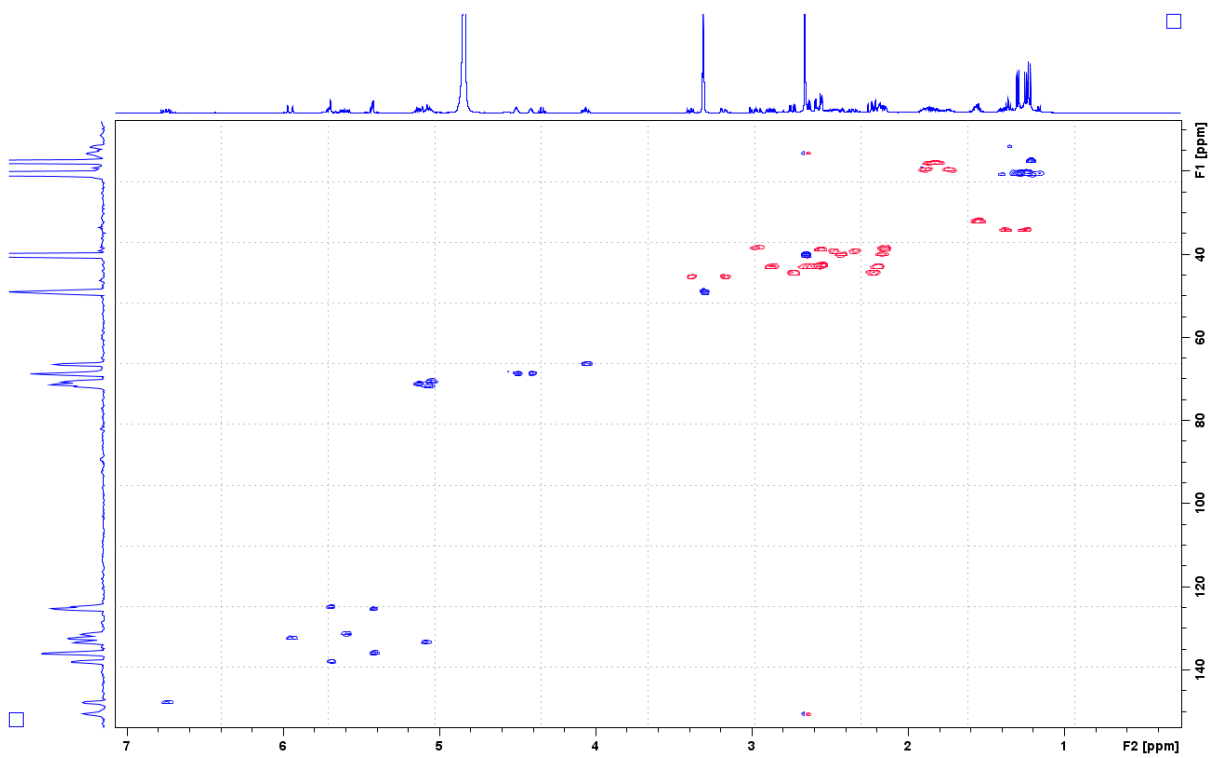

Figure S12. HSQC of Dendrodolide I
